# Supplementary material
Source: Royal Society of Chemistry journal article supplement (doi:10.1039/d6ma00118a)
Supplement: d6ma00118a1.pdf [file d6ma00118a1.pdf]

Supporting Information for

**Counter-Ion-Regulated Fluoride Sensing by a Silyl-Protected, Highly Conjugated Molecular Wire: From On-Field Analysis to Quantification of Nerve Gas Simulants**

Prashant. D. Dewale, and Nilanjan Dey<sup>[a]\*</sup>

<sup>[a]</sup>Department of Chemistry, Birla Institute of Technology and Science Pilani, Hyderabad campus,  
Hyderabad, Telangana 500078, India

Email: nilanjandey.iisc@gmail.com, nilanjan@hyderabad.bits-pilani.ac.in

**Experimental Section**

1.1 General: All chemicals (reagents, solvents and chemicals) were bought from best-known local chemical suppliers, such as Sigma Aldrich, Spectrochem, Avra, etc and used without further purification. Solvents were distilled and dried before use. FTIR spectra were recorded on a Perkin-Elmer FTIR Spectrum BX system and were reported in wave numbers ( $\text{cm}^{-1}$ ). Furthermore,  $^1\text{H}$  nuclear magnetic resonance spectra were recorded on Bruker Avance DRX 400 spectrophotometer operating at 400 MHz for  $^1\text{H}$  spectroscopy at 25 °C. The chemical shifts in spectra were reported in parts per million (ppm) and referenced to the residual solvent signal as the internal standard;  $^1\text{H}$  NMR spectra (DMSO- $d_6$   $\delta$  2.50 ppm). Mass spectra were recorded on Micromass Q-TOF Micro TM spectrometer.

1.2 Spectroscopic studies: The UV-Vis spectra were recorded on a JASCO V-650 UV-Vis spectrophotometer, whereas the fluorescence spectra were recorded on Shimadzu RF 6000 Spectrofluorimeter. The slit-width for the fluorescence experiment was kept at 5 nm (excitation) and 5 nm (emission), and the excitation wavelength was set at 390 nm. Sensing was carried out by adding requisite amounts of anions and nerve agents in DMF- $\text{H}_2\text{O}$  (9:1) medium. Titrations were performed by adding requisite amounts of anions and compound 1 to the quartz cuvette (10 mm) filled with 2 mL of the solvent buffer medium. Subsequently, higher concentrations of anions were added to the probe solution and the FL was recorded.

1.3  $^1\text{H}$  NMR Studies:  $^1\text{H}$  NMR titration studies of compound 1 (5 mM) were performed with KF and TBAF (2 equiv..) in DMSO- $d_6$ / $\text{D}_2\text{O}$  (9:1) medium. The spectra were recorded using identical parameters.

1.4 Scanning Electron Microscopy (SEM): Samples for SEM analysis were drop-cast onto a silicon wafer at the desired concentrations, followed by overnight solvent evaporation. The silicon wafer was subsequently sputter-coated using a Leica Ultra Microtome EM UC7. The prepared stubs were then imaged at 1  $\mu\text{m}$  magnification using an FEI Apreo LoVac.

1.5 Dynamic Light Scattering (DLS) Study: Anton Paar Litesizer 500 at 25 °C was used for DLS analysis. The samples were thoroughly mixed to ensure uniform suspension before recording.

## **Design and Synthesis of Probe Molecule**

Synthesis of compound 1

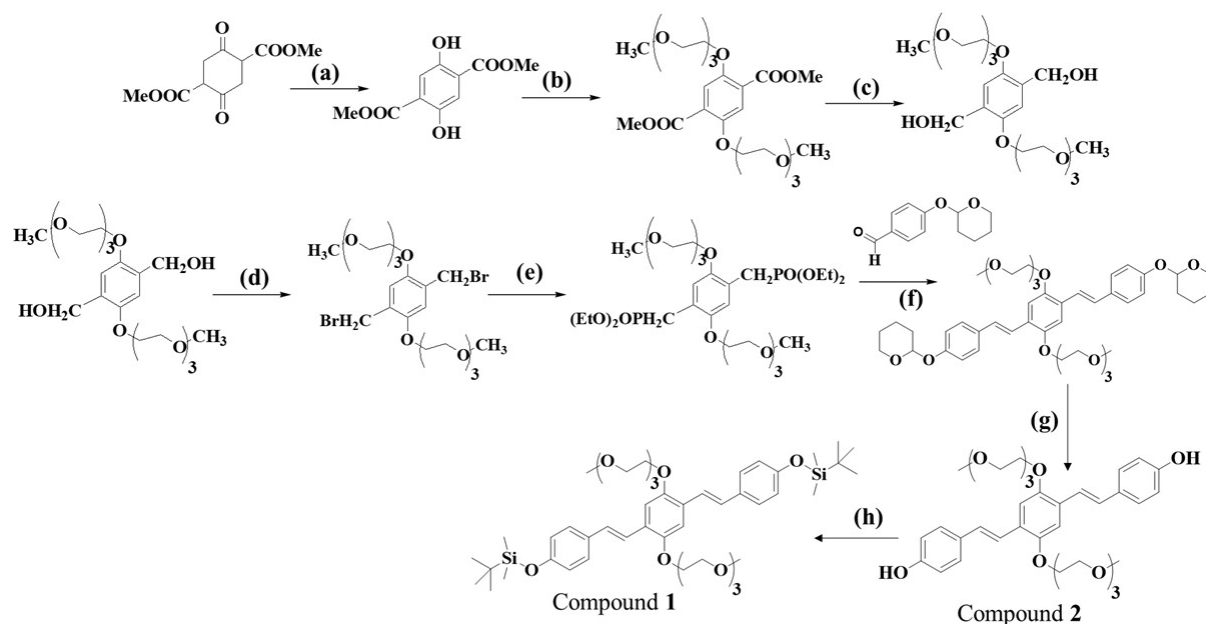

**Reagents, conditions and yield:** (a) NCS, HOAc, 80 °C, 1h, 85%;(b) K<sub>2</sub>CO<sub>3</sub>, Dry DMF, 60 °C, 48 h, 60%;(c) LAH, Dry THF, 80 °C, 4h, 70%;(d) PBr<sub>3</sub>, Dry THF, Reflux, 2 h, 25%; (e) P(OEt)<sub>3</sub>, reflux, 2 h, 95% (f) K<sup>t</sup>BuO, Dry THF, 5 minute, rt, 95% (g) H<sup>+</sup>, MeOH/THF, rt, 30 min., 90%; (h) TBDMSCl, Imidazole, DMAP, Dry DCM, rt, 2h, 85%.

To a solution of the dimethyl cyclohexanedione derivative (1.0 equiv.) in HOAc, NCS (1.2 equiv.) was added, and the reaction mixture was stirred at 80 °C for 1 h to afford the aromatic diol (a, 85%). The obtained intermediate was reacted with K<sub>2</sub>CO<sub>3</sub> (3.0 equiv.) and PEG methyl ether bromide (2.5 equiv.) in dry DMF at 60 °C for 48 h to yield the dialkoxy derivative (b, 60%).

Reduction with LiAlH<sub>4</sub> (3.0 equiv.) in dry THF at 80 °C for 4 h furnished the corresponding diol (c, 70%), which on treatment with PBr<sub>3</sub> (2.5 equiv.) in dry THF under reflux for 2 h gave the dibromide (d, 25%). Subsequent reaction with P(OEt)<sub>3</sub> (5.0 equiv.) under reflux for 2 h afforded the bis-phosphonate ester (e, 95%).

The phosphonate intermediate underwent Horner–Wadsworth–Emmons olefination with the 4-((Tetrahydro-2H-pyran-2-yl)oxy)benzaldehyde (2.2 equiv.) in the presence of K<sup>t</sup>Bu (3.0 equiv.) in dry THF at room temperature for 5 min to yield the conjugated product (f, 95%). Acidic deprotection in MeOH/THF (1:1) at room temperature for 30 min furnished **Compound 2** (g, 90%).

Finally, protection of the phenolic hydroxyl groups was achieved using TBDMSCl (2.5 equiv.), imidazole (3.0 equiv.), and catalytic DMAP in dry DCM at room temperature for 2 h to afford the target **Compound 1** (h, 85%).

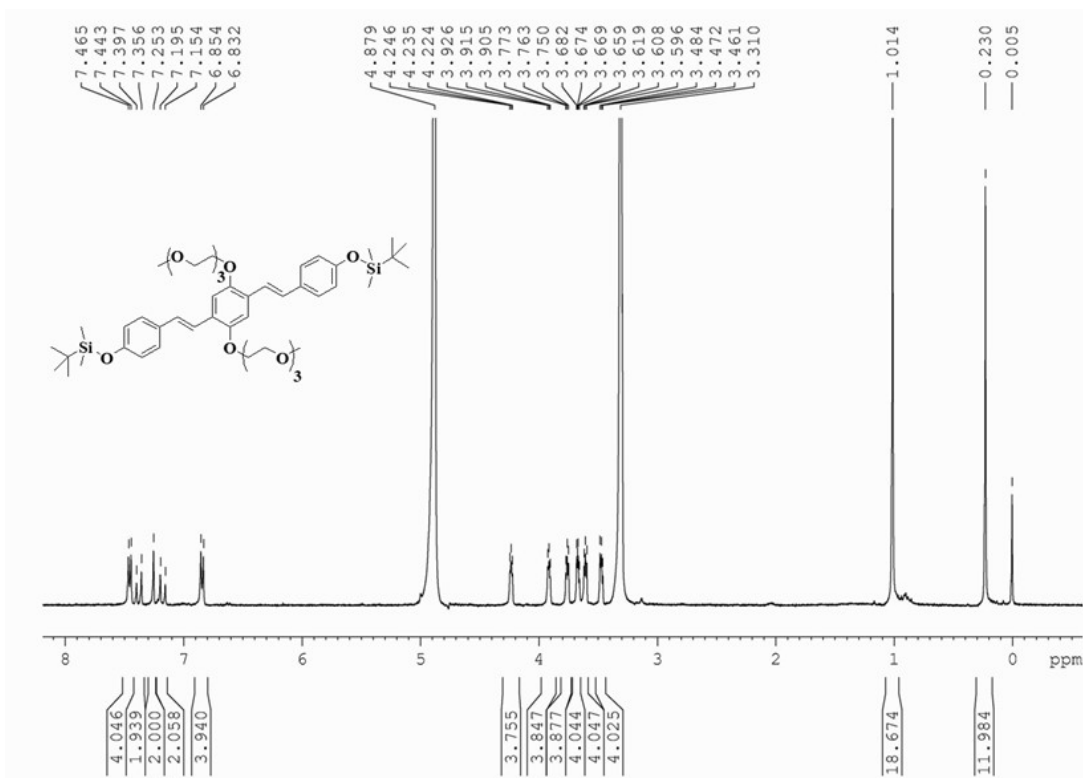

**Figure S1.** <sup>1</sup>H-NMR spectrum of compound 1.

### Additional Spectral Data

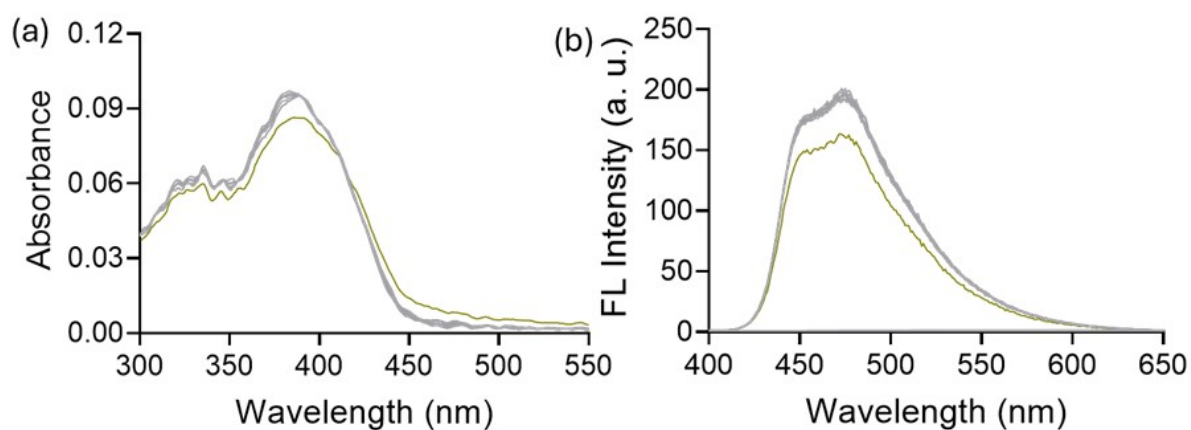

**Figure S2.** (a) UV-visible spectra of compound 1 (10  $\mu$ M) with different anions (2 mM) in aqueous medium (pH 7.5 buffer). (b) Fluorescence spectra of compound 1 (10  $\mu$ M,  $\lambda_{ex}$  = 390 nm) with different anions (2 mM) in aqueous medium (pH 7.5 buffer).

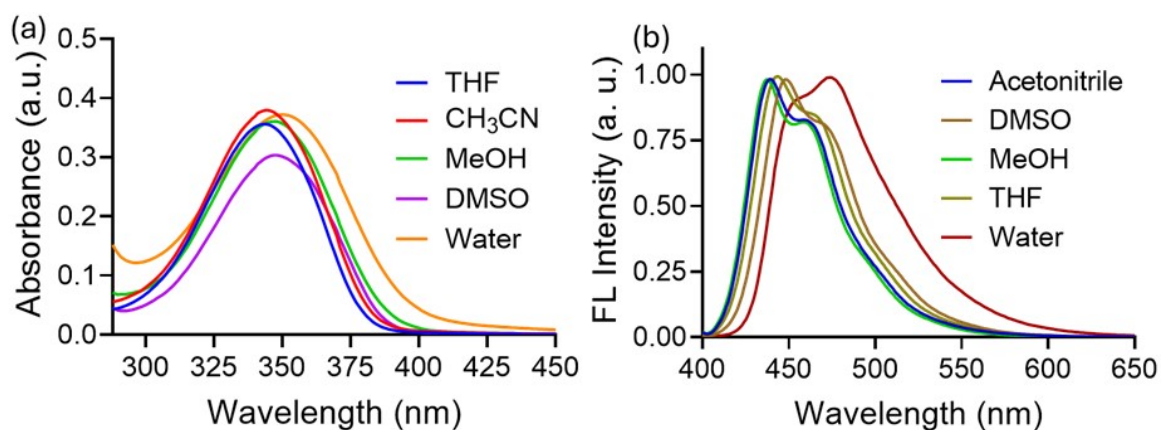

**Figure S3.** Normalized fluorescence spectra of compound 1 (10  $\mu$ M,  $\lambda_{ex}$  = 390 nm) in different organic solvents and in water medium.

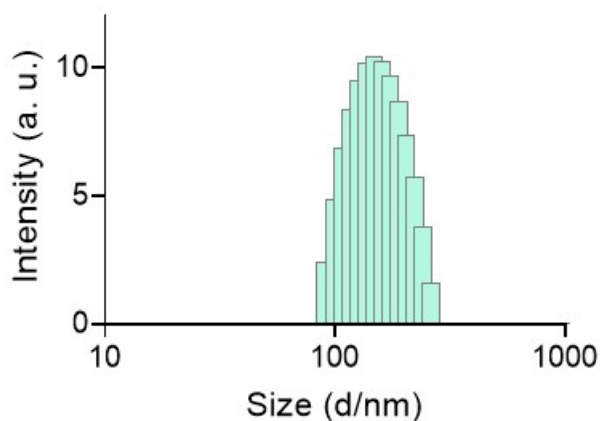

**Figure S4.** Average hydrodynamic diameters of compound 1 (10  $\mu$ M) in water medium.

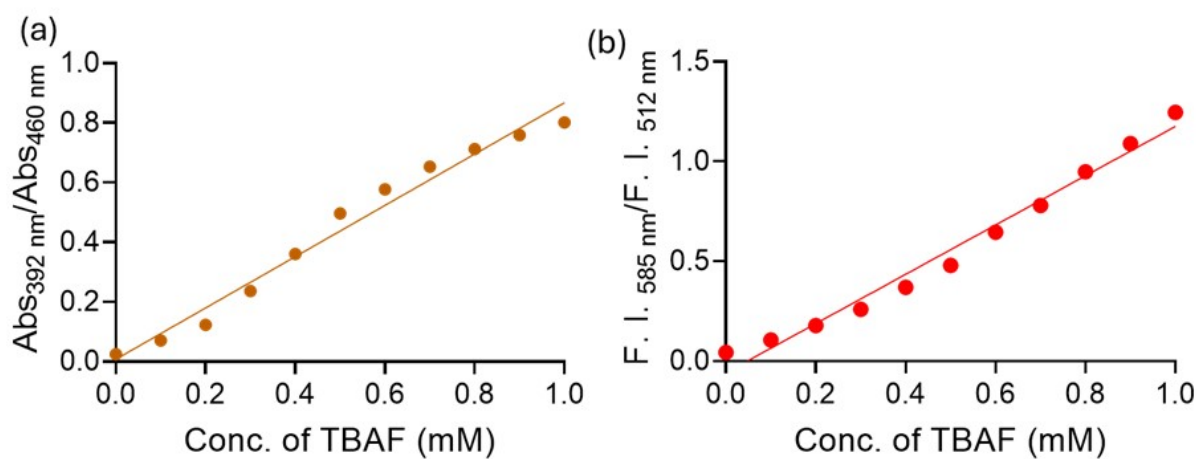

**Figure S5.** (a) Ratiometric changes in absorbance of compound 1 (10  $\mu\text{M}$ ) upon addition of TBAF (0 - 1 mM) in DMF-H<sub>2</sub>O (9:1, pH 7.5 buffer) mixture medium. (b) Ratiometric changes in fluorescence of compound 1 (10  $\mu\text{M}$ ,  $\lambda_{\text{ex}}$  = 390 nm) upon addition of TBAF (0 - 1 mM) in DMF-H<sub>2</sub>O (9:1, pH 7.5 buffer) mixture medium.

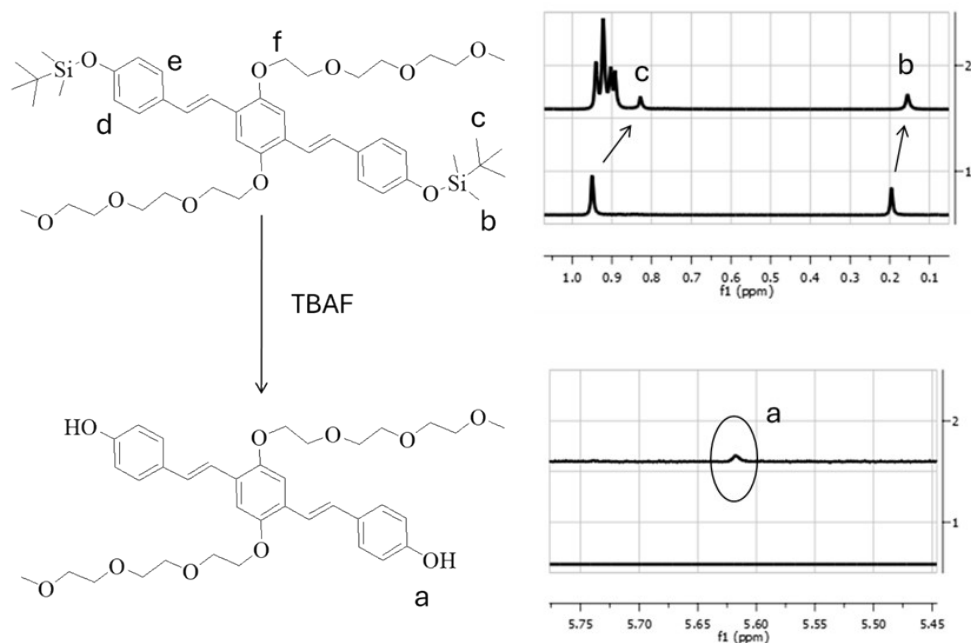

**Figure S6.** Partial <sup>1</sup>H-NMR spectra of compound 1 (5 mM) with TBAF (2 equiv..) in DMSO-d<sub>6</sub>/D<sub>2</sub>O (9:1) medium. [inset shows the structure of compound 1 along with the concerned protons]

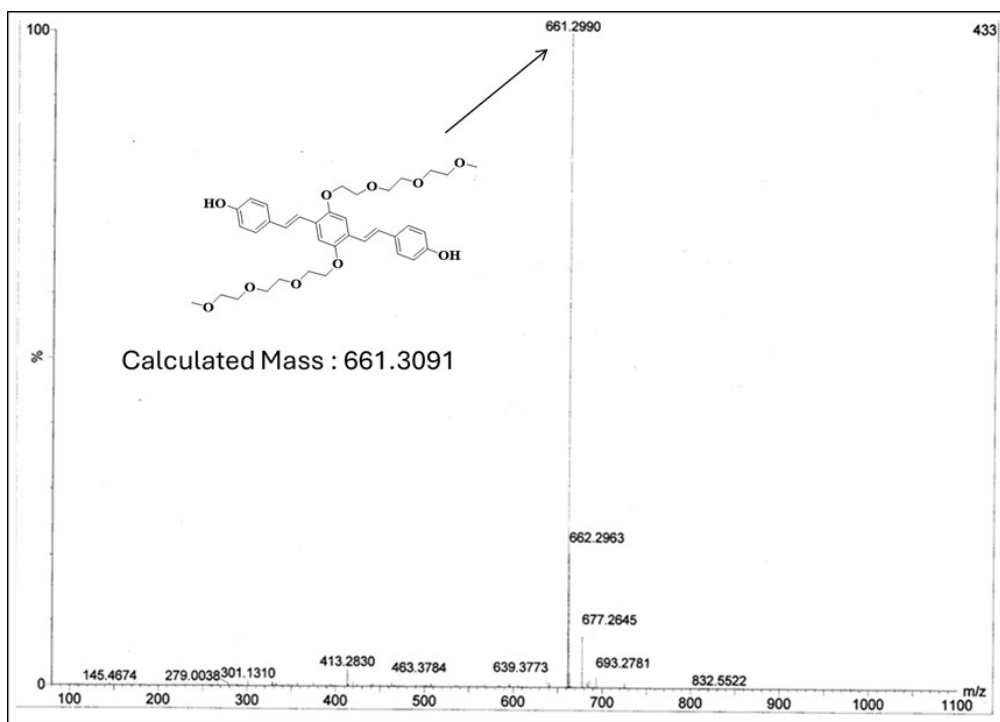

**Figure S7.** ESI-MS mass spectrum of compound 1 with TBAF showed formation of desilylated product.

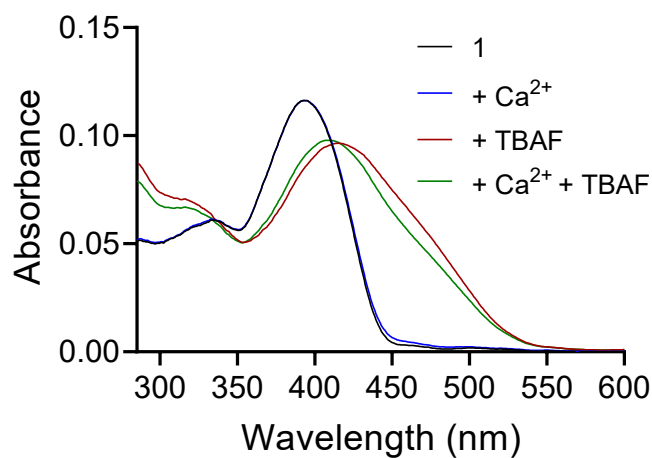

**Figure S8.** UV-visible spectra of compound 1 (10  $\mu\text{M}$ ) with  $\text{Ca}^{2+}$  ions (1 mM) when pretreated with TBAF (1 mM) in DMF- $\text{H}_2\text{O}$  (9:1, pH 7.5 buffer).

| S. No. | Solvent      | Quantum Yield |
|--------|--------------|---------------|
| 1      | Water        | 0.0616        |
| 2      | DMSO         | 0.2638        |
| 3      | Methanol     | 0.202         |
| 4      | Acetonitrile | 0.362         |
| 5      | THF          | 0.4986        |

**Table S1.** Solvent-dependent fluorescence quantum yields (%) of compound 1

| Molecule                             | ENERGY    | HOMO    | LUMO    | ENERGY GAP | DIPOLE MOMENT |
|--------------------------------------|-----------|---------|---------|------------|---------------|
| Comp 1 silylated                     | 2575.6326 | -0.1720 | -0.0510 | -0.1209    | 2.1219        |
| Comp 1 desilylated (OH)              | 1527.8764 | -0.1727 | -0.0517 | -0.1209    | 2.0386        |
| Comp 1 desilylated (O <sup>-</sup> ) | 1526.6961 | +0.0582 | +0.1446 | 0.0864     | 5.7809        |

**Table S2.** DFT-calculated structural and electronic parameters of the silylated, hydroxy, and phenoxide forms of compound 1, including total energies, HOMO–LUMO energies, energy gaps, and dipole moments.

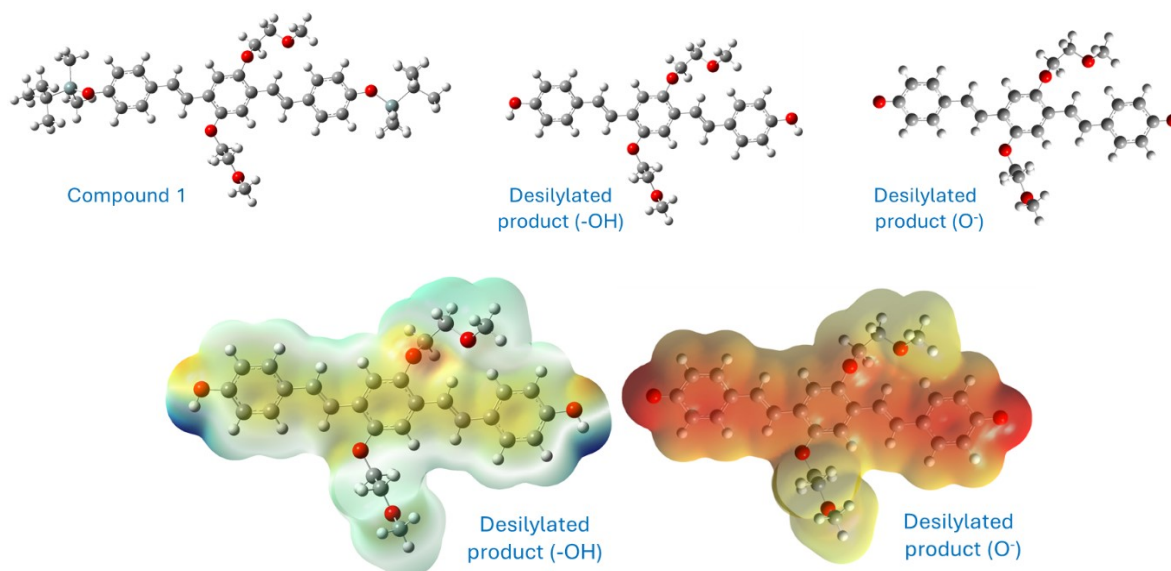

**Figure S9.** DFT-optimized geometries of compound 1 in its silylated, hydroxy, and phenoxide forms
